# Supplementary material for: PEDIA: prioritization of exome data by image analysis
Source: PubMed Central journal article supplement (PMC6892739; doi:10.1038/s41436-019-0566-2), 2019-06-05
Supplement: 41436_2019_566_MOESM1_ESM.pdf [file 41436_2019_566_MOESM1_ESM.pdf]

# Prioritization of Exome Data by Image Analysis

## Supplementary Material

Hsieh, Tzung-Chien <sup>\*1, 2</sup>, Mensah, Martin-Atta <sup>\*2, 3</sup>, Pantel, Jean Tori<sup>2, 3</sup>, Aguilar, Dione<sup>4</sup>, Bar, Omri<sup>5</sup>, Bayat, Allan<sup>6</sup>, Becerra-Solano, Luis<sup>7</sup>, Bentzen, Heidi Beate<sup>8</sup>, Biskup, Saskia<sup>9</sup>, Borisov, Oleg<sup>1</sup>, Braaten, Oivind<sup>10</sup>, Ciaccio, Claudia<sup>11</sup>, Coutelier, Marie<sup>2</sup>, Cremer, Kirsten<sup>12</sup>, Danyel, Magdalena<sup>2</sup>, Daschkey, Svenja<sup>13</sup>, David Eden, Hilda<sup>5</sup>, Devriendt, Koenraad<sup>14</sup>, Dölken, Sandra<sup>15</sup>, Douzgou, Sofia<sup>16, 17</sup>, Đukić, Dejan<sup>1</sup>, Ehmke, Nadja<sup>2</sup>, Fauth, Christine<sup>18</sup>, Fischer-Zirnsak, Björn<sup>2</sup>, Fleischer, Nicole<sup>5</sup>, Gabriel, Heinz<sup>19</sup>, Graul-Neumann, Luitgard<sup>2</sup>, Gripp, Karen W.<sup>20</sup>, Gurovich, Yaron<sup>5</sup>, Gusina, Asya<sup>21</sup>, Haddad, Nechama<sup>2</sup>, Hajjir, Nurulhuda<sup>2</sup>, Hanani, Yair<sup>5</sup>, Hertzberg, Jakob<sup>2</sup>, Hoertnagel, Konstanze<sup>9</sup>, Howell, Janelle<sup>22</sup>, Ivanovski, Ivan<sup>23</sup>, Kaindl, Angela<sup>24</sup>, Kamphans, Tom<sup>25</sup>, Kamphausen, Susanne<sup>26</sup>, Karimov, Catherine<sup>27</sup>, Kathom, Hadil<sup>28</sup>, Keryan, Anna<sup>27</sup>, Knaus, Alexej<sup>1</sup>, Köhler, Sebastian<sup>29</sup>, Kornak, Uwe<sup>2</sup>, Lavrov, Alexander<sup>30</sup>, Leitheiser, Maximilian<sup>2</sup>, Lyon, Gholson J.<sup>31</sup>, Mangold, Elisabeth<sup>32</sup>, MarĀņn Reina, PurificaciĀņn<sup>33</sup>, Martinez Carrascal, Antonio<sup>34</sup>, Mitter, Diana<sup>35</sup>, Morlan Herrador, Laura<sup>36</sup>, Nadav, Guy<sup>5</sup>, Nöthen, Markus<sup>12</sup>, Orrico, Alfredo<sup>37</sup>, Ott, Claus-Eric<sup>2</sup>, Park, Kristen<sup>38</sup>, Peterlin, Borut<sup>39</sup>, Pölsler, Laura<sup>18</sup>, Raas-Rothschild, Annick<sup>40</sup>, Randolph, Linda<sup>27</sup>, Revencu, Nicole<sup>41</sup>, Ringmann Fagerberg, Christina<sup>42</sup>, Robinson, Peter Nick<sup>43</sup>, Rosnev, Stanislav<sup>2</sup>, Rudnik, Sabine<sup>18</sup>, Rudolf, Gorazd<sup>39</sup>, Schatz, Ulrich<sup>18</sup>, Schossig, Anna<sup>18</sup>, Schubach, Max<sup>3</sup>, Shanoon, Or<sup>5</sup>, Sheridan, Eamonn<sup>44</sup>, Smirin-Yosef, Pola<sup>45</sup>, Spielmann, Malte<sup>2</sup>, Suk, Eun-Kyung<sup>46</sup>, Sznajer, Yves<sup>47</sup>, Thiel, Christian Thomas<sup>48</sup>, Thiel, Gundula<sup>46</sup>, Verloes, Alain<sup>49</sup>, Vrecar, Irena<sup>39</sup>, Wahl, Dagmar<sup>50</sup>, Weber, Ingrid<sup>18</sup>, Winter, Korina<sup>2</sup>, Wiśniewska, Marzena<sup>51</sup>, Wollnik, Bernd<sup>52</sup>, Yeung, Ming Wai<sup>1</sup>, Zhao, Max<sup>2</sup>, Zhu, Na<sup>2</sup>, Zschocke, Johannes<sup>18</sup>, Mundlos, Stefan<sup>2</sup>, Horn, Denise<sup>2</sup>, and Krawitz, Peter<sup>1, +</sup>

<sup>1</sup>Institute of Genomic Statistics and Bioinformatics, University of Bonn, Bonn, Germany

<sup>2</sup>Charité Universitätsmedizin Berlin, corporate member of Freie Universität Berlin, Humboldt-Universität zu Berlin, and Berlin Institute of Health, Institute of Medical Genetics and Human Genetics, Berlin, Germany

<sup>3</sup>Berlin Institute of Health (BIH), Anna-Louisa-Karsch 2, 10178 Berlin, Germany

<sup>4</sup>Monterrey Institute of Technology and Higher Education, Mexico

<sup>5</sup>FDNA Inc., Boston Massachusetts, United States

<sup>6</sup>Rigshospitalet, Department of Neurology, Copenhagen, Denmark

<sup>7</sup>Unidad de Investigación Médica en Medicina Reproductiva, Mexico

<sup>8</sup>Centre for Medical Ethics, Faculty of Medicine and the Norwegian Research Center for Computers and Law, Faculty of Law, University of Oslo, Oslo, Norway

<sup>9</sup>CeGaT GmbH, Tübingen, Germany

<sup>10</sup>Faculty of Medicine, Department of Medical Genetics, University of Oslo, Blindern, Oslo, Norway

<sup>11</sup>University of Milan, Milan, Italy

<sup>12</sup>Department of Human Genetics, University Hospital of Bonn, Bonn, Germany

<sup>13</sup>Heinrich Heine University Düsseldorf, Düsseldorf, Germany

<sup>14</sup>Catholic University Leuven, Leuven, Belgium

<sup>15</sup>University of Hamburg, Hamburg, Germany

<sup>16</sup>Manchester Centre for Genomic Medicine, St Mary's Hospital, Central Manchester University Hospitals NHS Foundation Trust Manchester Academic Health Sciences Centre, Manchester, United Kingdom

<sup>17</sup>School of Biological Sciences, Division of Evolution and Genomic Sciences, University of Manchester, Manchester, United Kingdom

<sup>18</sup>Division of Human Genetics, Medical University of Innsbruck, Innsbruck, Austria

<sup>19</sup>University of Tübingen, Tübingen, Germany

<sup>20</sup>A. I. duPont Hospital for Children, Wilmington, United States

<sup>21</sup>National Research and Applied Medicine Centre "Mother and Child", Belarus

<sup>22</sup>Lineagen, United States

<sup>23</sup>Santa Maria Nuova Hospital, Italy

<sup>24</sup>Center for Chronically Sick Children (Sozialpädiatrisches Zentrum, SPZ), Charité - Universitätsmedizin Berlin, Berlin, Germany

<sup>25</sup>GeneTalk, Bonn, Germany

<sup>26</sup>University Hospital Magdeburg, Magdeburg, Germany

<sup>27</sup>Children's Hospital of Los Angeles, Los Angeles, United States

<sup>28</sup>Medical University of Sofia, Sofia, Bulgaria

<sup>29</sup>Charité – Universitätsmedizin Berlin, corporate member of Freie Universität Berlin, Humboldt-Universität zu Berlin, and Berlin Institute of Health, NeuroCure Clinical Research Center, Berlin, Germany

<sup>30</sup>Research Institute of Medical Genetics of Russian Academy of Medical Sciences, Russian Federation

<sup>31</sup>Cold Spring Harbor Laboratory, Woodbury, United States

<sup>32</sup>University of Bonn, Bonn, Germany

<sup>33</sup>Hospital General Universitario De Valencia, Valencia, Spain

<sup>34</sup>Hospital General De Requena, Servicio Pediatría, Spain

<sup>35</sup>University Hospital Leipzig, Leipzig, Germany

<sup>36</sup>Hospital Universitario Miguel Servet, Spain

<sup>37</sup>Azienda Ospedaliera Universitaria Senese, Siena, Italy

<sup>38</sup>Children's Hospital Colorado, United States

<sup>39</sup>Clinical Institute of Medical Genetics, University Medical Centre Ljubljana, Ljubljana, Slovenia

<sup>40</sup>Sheba Medical Center, Israel

<sup>41</sup>Université Catholique de Louvain, Bruxelles, Belgium

<sup>42</sup>Odense University Hospital, Odense, Denmark

<sup>43</sup>The Jackson Laboratory for Genomic Medicine, Farmington, United States

<sup>44</sup>School of Medicine, University of Leeds, Leeds, United Kingdom

<sup>45</sup>Ariel University, Ariel, Israel

<sup>46</sup>Center for Prenatal Diagnosis and Human Genetics, Berlin, Germany

<sup>47</sup>Cliniques universitaires Saint Luc UCL, Bruxelles, Belgium

<sup>48</sup>Institute of Human Genetics, Friedrich-Alexander-Universität Erlangen-Nürnberg FAU, Erlangen, Erlangen, Germany

<sup>49</sup>Hopital Robert Debré, Paris, France

<sup>50</sup>Center for Human Genetics and Laboratory Diagnostics, Germany

<sup>51</sup>Poznań University of Medical Sciences, Poznań, Poland

<sup>52</sup>University Medical Center Göttingen, Göttingen, Germany

\* equally contributing first authors

+ corresponding author, pkrawitz@uni-bonn.de

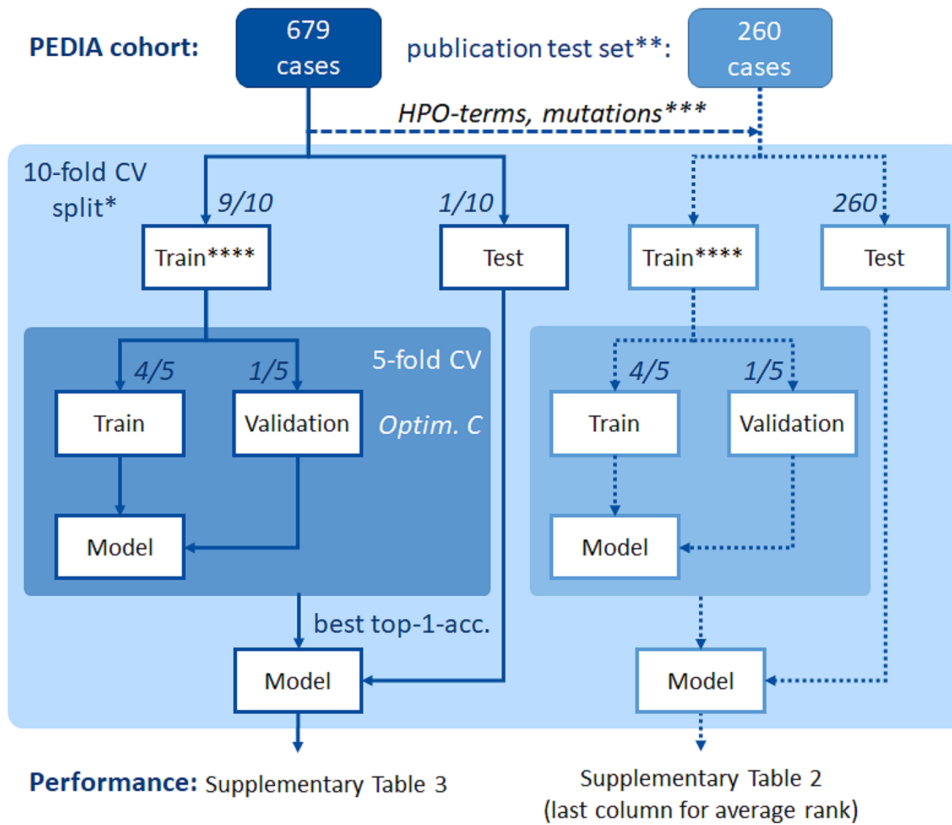

**Supplementary Figure 1:** Training flowchart. (CV: cross-validation; optim.: optimizing; top-1-acc: top-1-accuracy; \*cases with the same disease-causing gene were sampled to one bin; \*\*from DeepGestalt, contains only photos, labeled with diagnosis; \*\*\*random assignment of a photo to a matching case from PEDIA cohort to test set. The cases in PEDIA cohort with the same mutations in test set were removed from training set; \*\*\*\*the entire data is available as json files at: [www.pedia-study.org/pedia\\_services/download](http://www.pedia-study.org/pedia_services/download))

The influence of the ethnic background on the performance of the PEDIA approach was analyzed by spiking in the disease-causing mutations into the different populations of the 1000 genomes project (ACB, African Caribbeans in Barbados; ASW Americans of African Ancestry in SW USA; BEB, Bengali from Bangladesh; CDX, Chinese Dai in Xishuangbanna, China; CEU Western European Ancestry; CHB Han Chinese in Beijing, China; CHS, Southern Han Chinese; CLM, Colombians from Medellin, Colombia; ESN, Esan in Nigeria; FIN, Finnish in Finland; GBR, British in England Scotland; GIH, Gujarati Indian from Houston Texas; GWD, Gambian in Western Divisions in the Gambia; IBS, Iberian Population in Spain; ITU, Indian Telugu from the UK; JPT, Japanese in Tokyo, Japan; KHV, Kinh in Ho Chi Minh City, Vietnam; LWK, Luhya in Webuye, Kenya; MSL, Mende in Sierra Leone; MXL, Mexican Ancestry from Los Angeles USA; PEL, Peruvians from Lima, Peru; PJJ, Punjabi from Lahore, Pakistan; PUR, Puerto Ricans from Puerto Rico; STU, Sri Lankan Tamil from the UK; TSI, Toscani in Italia; YRI, Yoruba in Ibadan, Nigeria).

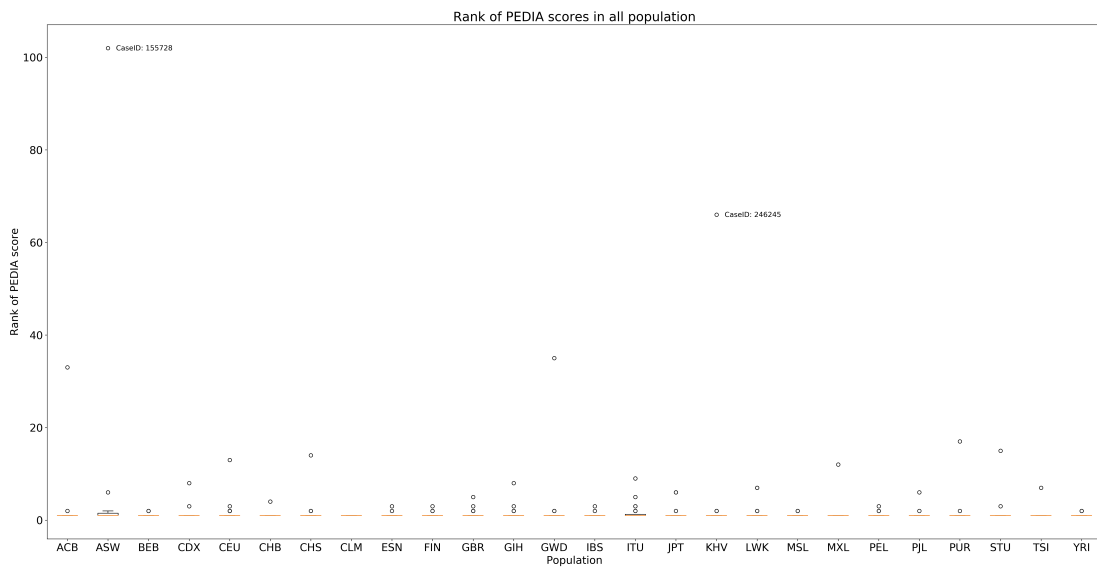

**Supplementary Figure 2:** The disease-causing mutations of the PEDIA cohort have been spiked into randomly selected samples from the 1KGP project. The figure shows the results of a simulation. The mean rank that the disease-causing gene achieves, does not depend on the ethnic background. In two cases the performance is exceptionally poor, due to a low CADD score of the pathogenic variant (case ID 246245) and due to a faulty link between disorder and disease-causing gene (case ID 155728).

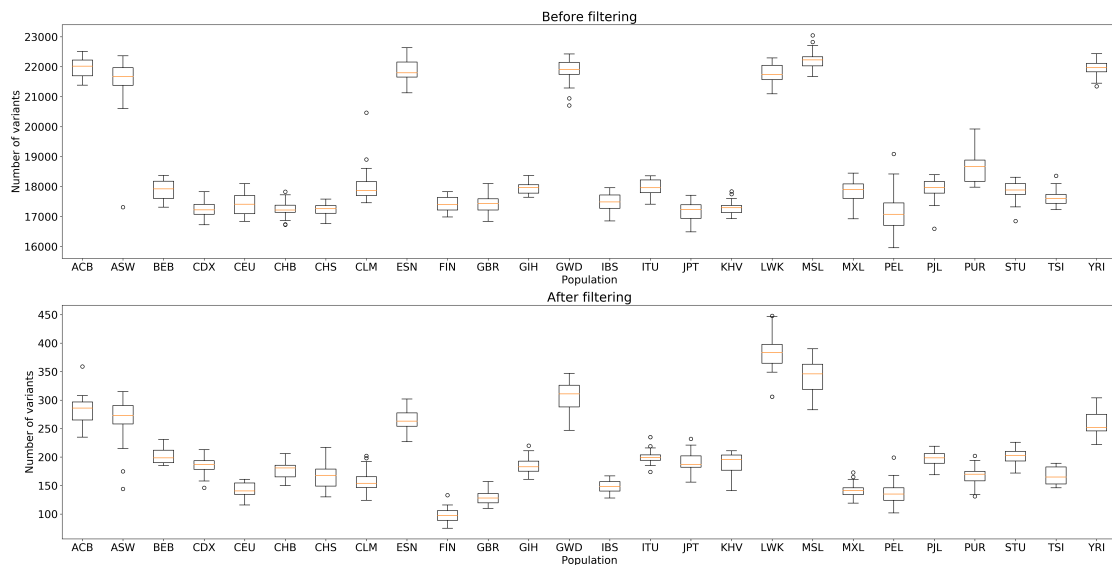

**Supplementary Figure 3:** The number of variants that are called in reference-guided exome sequencing varies depending on the ethnic background. Filtering according to Wright, et al., results in 100 to 400 rare variants, with the smallest numbers observed in individuals from Finland and the largest in individuals from Kenya.

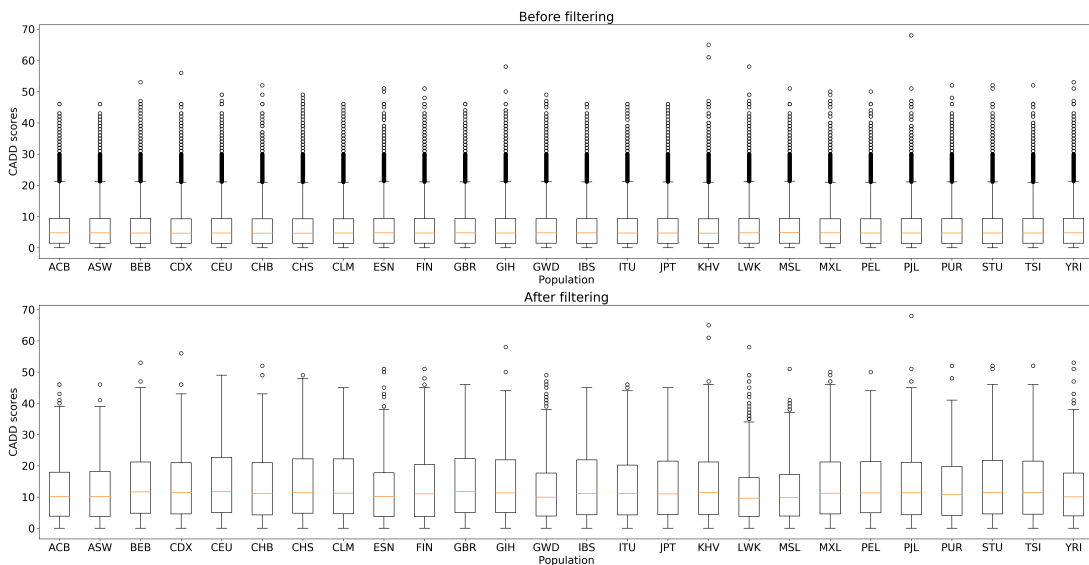

**Supplementary Figure 4:** The distribution of CADD scores is less dependent on the ethnic background. In all populations there is a shift in the median of the CADD scores after filtering for rare variants.

**Supplementary Table 2:** Comparison of results by using DeepGestalt and PEDIA on DeepGestalt publication test set. The PEDIA rank is the average rank. In order to download the images, you should first login to Face2Gene and then follow the links in the table. For any questions or requests, please contact Yaron Gurovich (yaron@fdna.com).

| Index | Syndrome Name                                        | Photo Link                                                                                                        | DeepGestalt | PEDIA |
|-------|------------------------------------------------------|-------------------------------------------------------------------------------------------------------------------|-------------|-------|
| 1     | Alagille Syndrome                                    | <a href="https://app.face2gene.com/dg/lmd/110/photo/345">https://app.face2gene.com/dg/lmd/110/photo/345</a>       | 28          | 1.8   |
| 2     | Nijmegen Breakage Syndrome; NBS                      | <a href="https://app.face2gene.com/dg/lmd/347/photo/4734">https://app.face2gene.com/dg/lmd/347/photo/4734</a>     | 2           | 1.0   |
| 3     | Nijmegen Breakage Syndrome; NBS                      | <a href="https://app.face2gene.com/dg/lmd/347/photo/4730">https://app.face2gene.com/dg/lmd/347/photo/4730</a>     | 2           | 1.0   |
| 4     | Craniodiaphyseal Dysplasia; CDD                      | <a href="https://app.face2gene.com/dg/lmd/373/photo/1088">https://app.face2gene.com/dg/lmd/373/photo/1088</a>     | 1           | 1.0   |
| 5     | Noonan Syndrome                                      | <a href="https://app.face2gene.com/dg/lmd/1946/photo/5976">https://app.face2gene.com/dg/lmd/1946/photo/5976</a>   | 19          | 1.4   |
| 6     | Noonan Syndrome                                      | <a href="https://app.face2gene.com/dg/lmd/1946/photo/5985">https://app.face2gene.com/dg/lmd/1946/photo/5985</a>   | 11          | 1.1   |
| 7     | Smith-Lemli-Opitz Syndrome; SLOS                     | <a href="https://app.face2gene.com/dg/lmd/1608/photo/4893">https://app.face2gene.com/dg/lmd/1608/photo/4893</a>   | 1           | 1.0   |
| 8     | Kabuki Syndrome                                      | <a href="https://app.face2gene.com/dg/lmd/893/photo/2567">https://app.face2gene.com/dg/lmd/893/photo/2567</a>     | 1           | 1.0   |
| 9     | Focal Facial Dermal Dysplasia 3, Setleis Type; FFDD3 | <a href="https://app.face2gene.com/dg/lmd/1570/photo/4760">https://app.face2gene.com/dg/lmd/1570/photo/4760</a>   | 5           | 1.0   |
| 10    | Burn-McKeown Syndrome; BMKS                          | <a href="https://app.face2gene.com/dg/lmd/2907/photo/6717">https://app.face2gene.com/dg/lmd/2907/photo/6717</a>   | 1           | 1.0   |
| 11    | Burn-McKeown Syndrome; BMKS                          | <a href="https://app.face2gene.com/dg/lmd/2907/photo/6716">https://app.face2gene.com/dg/lmd/2907/photo/6716</a>   | 1           | 1.0   |
| 12    | Burn-McKeown Syndrome; BMKS                          | <a href="https://app.face2gene.com/dg/lmd/2907/photo/6719">https://app.face2gene.com/dg/lmd/2907/photo/6719</a>   | 18          | 2.8   |
| 13    | Burn-McKeown Syndrome; BMKS                          | <a href="https://app.face2gene.com/dg/lmd/2907/photo/6720">https://app.face2gene.com/dg/lmd/2907/photo/6720</a>   | 1           | 1.0   |
| 14    | Meier-Gorlin Syndrome 1; MGORS1                      | <a href="https://app.face2gene.com/dg/lmd/808/photo/2269">https://app.face2gene.com/dg/lmd/808/photo/2269</a>     | 30          | 1.2   |
| 16    | Trichorhinophalangeal Syndrome, Type II; TRPS2       | <a href="https://app.face2gene.com/dg/lmd/971/photo/2778">https://app.face2gene.com/dg/lmd/971/photo/2778</a>     | 1           | 1.0   |
| 17    | Acrocallosal Syndrome; ACLS                          | <a href="https://app.face2gene.com/dg/lmd/23/photo/80">https://app.face2gene.com/dg/lmd/23/photo/80</a>           | 7           | 1.6   |
| 18    | Cohen Syndrome; COH1                                 | <a href="https://app.face2gene.com/dg/lmd/333/photo/1003">https://app.face2gene.com/dg/lmd/333/photo/1003</a>     | 1           | 1.0   |
| 19    | Schwartz-Jampel Syndrome, Type 1; SJS1               | <a href="https://app.face2gene.com/dg/lmd/1548/photo/4685">https://app.face2gene.com/dg/lmd/1548/photo/4685</a>   | 9           | 1.0   |
| 20    | Treacher Collins Syndrome 1; TCS1                    | <a href="https://app.face2gene.com/dg/lmd/1720/photo/5245">https://app.face2gene.com/dg/lmd/1720/photo/5245</a>   | 1           | 1.0   |
| 21    | Trichorhinophalangeal Syndrome                       | <a href="https://app.face2gene.com/dg/lmd/1730/photo/5290">https://app.face2gene.com/dg/lmd/1730/photo/5290</a>   | 1           | 1.0   |
| 22    | Velocardiofacial Syndrome                            | <a href="https://app.face2gene.com/dg/lmd/1762/photo/8285">https://app.face2gene.com/dg/lmd/1762/photo/8285</a>   | 3           | 1.0   |
| 23    | Smith-Lemli-Opitz Syndrome; SLOS                     | <a href="https://app.face2gene.com/dg/lmd/1608/photo/8342">https://app.face2gene.com/dg/lmd/1608/photo/8342</a>   | 1           | 1.0   |
| 24    | Marfan Syndrome; MFS                                 | <a href="https://app.face2gene.com/dg/lmd/1057/photo/8255">https://app.face2gene.com/dg/lmd/1057/photo/8255</a>   | 1           | 1.0   |
| 26    | Mowat-Wilson Syndrome; MOWS                          | <a href="https://app.face2gene.com/dg/lmd/4211/photo/13183">https://app.face2gene.com/dg/lmd/4211/photo/13183</a> | 1           | 1.0   |
| 27    | Mowat-Wilson Syndrome; MOWS                          | <a href="https://app.face2gene.com/dg/lmd/4211/photo/13743">https://app.face2gene.com/dg/lmd/4211/photo/13743</a> | 1           | 1.0   |
| 28    | Mowat-Wilson Syndrome; MOWS                          | <a href="https://app.face2gene.com/dg/lmd/4211/photo/13744">https://app.face2gene.com/dg/lmd/4211/photo/13744</a> | 1           | 1.0   |
| 29    | 3MC Syndrome 3; 3MC3                                 | <a href="https://app.face2gene.com/dg/lmd/1048/photo/14730">https://app.face2gene.com/dg/lmd/1048/photo/14730</a> | 2           | 1.0   |
| 30    | Sotos Syndrome 2; SOTOS2                             | <a href="https://app.face2gene.com/dg/lmd/1617/photo/15149">https://app.face2gene.com/dg/lmd/1617/photo/15149</a> | 1           | 1.1   |

|    |                                                            |                                                                                                                   |     |     |
|----|------------------------------------------------------------|-------------------------------------------------------------------------------------------------------------------|-----|-----|
| 31 | Sotos Syndrome 2;<br>SOTOS2                                | <a href="https://app.face2gene.com/dg/lmd/1617/photo/15152">https://app.face2gene.com/dg/lmd/1617/photo/15152</a> | 1   | 1.0 |
| 32 | Treacher Collins<br>Syndrome 1; TCS1                       | <a href="https://app.face2gene.com/dg/lmd/1720/photo/5227">https://app.face2gene.com/dg/lmd/1720/photo/5227</a>   | 1   | 1.0 |
| 33 | Coffin-Lowry Syndrome;<br>CLS                              | <a href="https://app.face2gene.com/dg/lmd/328/photo/958">https://app.face2gene.com/dg/lmd/328/photo/958</a>       | 1   | 1.0 |
| 35 | Mowat-Wilson Syndrome;<br>MOWS                             | <a href="https://app.face2gene.com/dg/lmd/4211/photo/16768">https://app.face2gene.com/dg/lmd/4211/photo/16768</a> | 1   | 1.0 |
| 36 | Donnai-Barrow<br>Syndrome                                  | <a href="https://app.face2gene.com/dg/lmd/3473/photo/16950">https://app.face2gene.com/dg/lmd/3473/photo/16950</a> | 49  | 1.2 |
| 37 | Floating-Harbor<br>Syndrome; FLHS                          | <a href="https://app.face2gene.com/dg/lmd/596/photo/17148">https://app.face2gene.com/dg/lmd/596/photo/17148</a>   | 17  | 1.2 |
| 38 | Pitt-Hopkins<br>Syndrome; PTHS                             | <a href="https://app.face2gene.com/dg/lmd/8892/photo/17151">https://app.face2gene.com/dg/lmd/8892/photo/17151</a> | 1   | 1.0 |
| 39 | Marshall-Smith<br>Syndrome; MRSHSS                         | <a href="https://app.face2gene.com/dg/lmd/7513/photo/17204">https://app.face2gene.com/dg/lmd/7513/photo/17204</a> | 1   | 1.0 |
| 40 | 3MC Syndrome 3; 3MC3                                       | <a href="https://app.face2gene.com/dg/lmd/1048/photo/17445">https://app.face2gene.com/dg/lmd/1048/photo/17445</a> | 110 | 1.9 |
| 42 | Waardenburg Syndrome,<br>Type 1; WS1                       | <a href="https://app.face2gene.com/dg/lmd/1781/photo/5438">https://app.face2gene.com/dg/lmd/1781/photo/5438</a>   | 37  | 1.0 |
| 44 | Sotos Syndrome 2;<br>SOTOS2                                | <a href="https://app.face2gene.com/dg/lmd/1617/photo/4945">https://app.face2gene.com/dg/lmd/1617/photo/4945</a>   | 1   | 1.0 |
| 45 | Pitt-Hopkins Syndrome;<br>PTHS                             | <a href="https://app.face2gene.com/dg/lmd/8892/photo/17999">https://app.face2gene.com/dg/lmd/8892/photo/17999</a> | 1   | 1.0 |
| 46 | Kabuki Syndrome                                            | <a href="https://app.face2gene.com/dg/lmd/893/photo/18077">https://app.face2gene.com/dg/lmd/893/photo/18077</a>   | 1   | 1.0 |
| 47 | Waardenburg Syndrome,<br>Type 1; WS1                       | <a href="https://app.face2gene.com/dg/lmd/1781/photo/8786">https://app.face2gene.com/dg/lmd/1781/photo/8786</a>   | 1   | 1.0 |
| 48 | Waardenburg Syndrome,<br>Type 1; WS1                       | <a href="https://app.face2gene.com/dg/lmd/1781/photo/8794">https://app.face2gene.com/dg/lmd/1781/photo/8794</a>   | 25  | 1.0 |
| 49 | Smith-Magenis<br>Syndrome; SMS                             | <a href="https://app.face2gene.com/dg/lmd/3562/photo/9086">https://app.face2gene.com/dg/lmd/3562/photo/9086</a>   | 1   | 1.0 |
| 51 | Seckel Syndrome                                            | <a href="https://app.face2gene.com/dg/lmd/739/photo/9429">https://app.face2gene.com/dg/lmd/739/photo/9429</a>     | 2   | 1.0 |
| 52 | Rothmund-Thomson<br>Syndrome; RTS                          | <a href="https://app.face2gene.com/dg/lmd/1487/photo/9782">https://app.face2gene.com/dg/lmd/1487/photo/9782</a>   | 66  | 1.4 |
| 54 | Coffin-Siris Syndrome1;<br>CSS1                            | <a href="https://app.face2gene.com/dg/lmd/329/photo/18535">https://app.face2gene.com/dg/lmd/329/photo/18535</a>   | 15  | 1.0 |
| 55 | Bohring-Opitz Syndrome;<br>BOPS                            | <a href="https://app.face2gene.com/dg/lmd/4337/photo/18830">https://app.face2gene.com/dg/lmd/4337/photo/18830</a> | 1   | 1.0 |
| 56 | SHORT syndrome                                             | <a href="https://app.face2gene.com/dg/lmd/1574/photo/4787">https://app.face2gene.com/dg/lmd/1574/photo/4787</a>   | 1   | 1.0 |
| 57 | Schwartz-Jampel<br>Syndrome, Type 1; SJS1                  | <a href="https://app.face2gene.com/dg/lmd/1548/photo/4686">https://app.face2gene.com/dg/lmd/1548/photo/4686</a>   | 4   | 1.0 |
| 58 | Hajdu-Cheney Syndrome;<br>HJCYS                            | <a href="https://app.face2gene.com/dg/lmd/722/photo/2067">https://app.face2gene.com/dg/lmd/722/photo/2067</a>     | 1   | 1.0 |
| 59 | Coffin-Lowry Syndrome;<br>CLS                              | <a href="https://app.face2gene.com/dg/lmd/328/photo/967">https://app.face2gene.com/dg/lmd/328/photo/967</a>       | 1   | 1.0 |
| 60 | Baraitser-Winter<br>Syndrome 1; BRWS1                      | <a href="https://app.face2gene.com/dg/lmd/149/photo/430">https://app.face2gene.com/dg/lmd/149/photo/430</a>       | 2   | 1.0 |
| 61 | Beckwith-Wiedemann<br>Syndrome; BWS                        | <a href="https://app.face2gene.com/dg/lmd/173/photo/480">https://app.face2gene.com/dg/lmd/173/photo/480</a>       | 3   | 1.0 |
| 62 | Baraitser-Winter<br>Syndrome 1; BRWS1                      | <a href="https://app.face2gene.com/dg/lmd/149/photo/432">https://app.face2gene.com/dg/lmd/149/photo/432</a>       | 2   | 1.0 |
| 66 | Sotos Syndrome 2;<br>SOTOS2                                | <a href="https://app.face2gene.com/dg/lmd/1617/photo/4944">https://app.face2gene.com/dg/lmd/1617/photo/4944</a>   | 1   | 1.0 |
| 67 | Cockayne Syndrome                                          | <a href="https://app.face2gene.com/dg/lmd/326/photo/946">https://app.face2gene.com/dg/lmd/326/photo/946</a>       | 1   | 1.0 |
| 68 | Acromicric Dysplasia                                       | <a href="https://app.face2gene.com/dg/lmd/30/photo/145">https://app.face2gene.com/dg/lmd/30/photo/145</a>         | 24  | 1.0 |
| 70 | Ectodermal Dysplasia 1,<br>Hypohidrotic, X-Linked;<br>XHED | <a href="https://app.face2gene.com/dg/lmd/508/photo/1407">https://app.face2gene.com/dg/lmd/508/photo/1407</a>     | 1   | 1.0 |
| 71 | Coffin-Lowry Syndrome;<br>CLS                              | <a href="https://app.face2gene.com/dg/lmd/328/photo/960">https://app.face2gene.com/dg/lmd/328/photo/960</a>       | 6   | 1.0 |

|     |                                                 |                                                                                                                   |    |     |
|-----|-------------------------------------------------|-------------------------------------------------------------------------------------------------------------------|----|-----|
| 72  | Mucopolipidosis II<br>Alpha/beta                | <a href="https://app.face2gene.com/dg/lmd/838/photo/2386">https://app.face2gene.com/dg/lmd/838/photo/2386</a>     | 5  | 1.0 |
| 73  | Beckwith-Wiedemann<br>Syndrome; BWS             | <a href="https://app.face2gene.com/dg/lmd/173/photo/484">https://app.face2gene.com/dg/lmd/173/photo/484</a>       | 6  | 1.0 |
| 74  | Craniodiaphyseal<br>Dysplasia; CDD              | <a href="https://app.face2gene.com/dg/lmd/373/photo/1093">https://app.face2gene.com/dg/lmd/373/photo/1093</a>     | 2  | 1.0 |
| 75  | Cockayne Syndrome                               | <a href="https://app.face2gene.com/dg/lmd/326/photo/948">https://app.face2gene.com/dg/lmd/326/photo/948</a>       | 3  | 1.0 |
| 76  | Floating-Harbor<br>Syndrome; FLHS               | <a href="https://app.face2gene.com/dg/lmd/596/photo/1761">https://app.face2gene.com/dg/lmd/596/photo/1761</a>     | 1  | 1.0 |
| 77  | Rubinstein-Taybi<br>Syndrome 1; RSTS1           | <a href="https://app.face2gene.com/dg/lmd/1490/photo/4474">https://app.face2gene.com/dg/lmd/1490/photo/4474</a>   | 1  | 1.0 |
| 78  | Coffin-Lowry Syndrome;<br>CLS                   | <a href="https://app.face2gene.com/dg/lmd/328/photo/970">https://app.face2gene.com/dg/lmd/328/photo/970</a>       | 1  | 1.0 |
| 79  | Coffin-Lowry Syndrome;<br>CLS                   | <a href="https://app.face2gene.com/dg/lmd/328/photo/971">https://app.face2gene.com/dg/lmd/328/photo/971</a>       | 1  | 1.0 |
| 80  | Apert Syndrome                                  | <a href="https://app.face2gene.com/dg/lmd/99/photo/326">https://app.face2gene.com/dg/lmd/99/photo/326</a>         | 1  | 1.0 |
| 81  | Branchiooculofacial<br>Syndrome; BOFS           | <a href="https://app.face2gene.com/dg/lmd/633/photo/8345">https://app.face2gene.com/dg/lmd/633/photo/8345</a>     | 1  | 1.0 |
| 82  | Smith-Lemli-Opitz<br>Syndrome; SLOS             | <a href="https://app.face2gene.com/dg/lmd/1608/photo/12105">https://app.face2gene.com/dg/lmd/1608/photo/12105</a> | 1  | 1.0 |
| 83  | Smith-Lemli-Opitz<br>Syndrome; SLOS             | <a href="https://app.face2gene.com/dg/lmd/1608/photo/12105">https://app.face2gene.com/dg/lmd/1608/photo/12105</a> | 1  | 1.0 |
| 84  | Coffin-Siris<br>Syndrome1; CSS1                 | <a href="https://app.face2gene.com/dg/lmd/329/photo/12535">https://app.face2gene.com/dg/lmd/329/photo/12535</a>   | 3  | 1.0 |
| 85  | Coffin-Siris<br>Syndrome1; CSS1                 | <a href="https://app.face2gene.com/dg/lmd/329/photo/12535">https://app.face2gene.com/dg/lmd/329/photo/12535</a>   | 2  | 1.0 |
| 86  | Kabuki Syndrome                                 | <a href="https://app.face2gene.com/dg/lmd/893/photo/13114">https://app.face2gene.com/dg/lmd/893/photo/13114</a>   | 1  | 1.0 |
| 87  | Kabuki Syndrome                                 | <a href="https://app.face2gene.com/dg/lmd/893/photo/13116">https://app.face2gene.com/dg/lmd/893/photo/13116</a>   | 1  | 1.0 |
| 88  | Mowat-Wilson Syndrome;<br>MOWS                  | <a href="https://app.face2gene.com/dg/lmd/4211/photo/13734">https://app.face2gene.com/dg/lmd/4211/photo/13734</a> | 1  | 1.0 |
| 89  | Mowat-Wilson Syndrome;<br>MOWS                  | <a href="https://app.face2gene.com/dg/lmd/4211/photo/13736">https://app.face2gene.com/dg/lmd/4211/photo/13736</a> | 58 | 1.5 |
| 90  | Mowat-Wilson Syndrome;<br>MOWS                  | <a href="https://app.face2gene.com/dg/lmd/4211/photo/13742">https://app.face2gene.com/dg/lmd/4211/photo/13742</a> | 1  | 1.0 |
| 91  | Borjeson-Forssman-<br>Lehmann Syndrome;<br>BFLS | <a href="https://app.face2gene.com/dg/lmd/216/photo/14759">https://app.face2gene.com/dg/lmd/216/photo/14759</a>   | 56 | 2.8 |
| 92  | Smith-Magenis<br>Syndrome; SMS                  | <a href="https://app.face2gene.com/dg/lmd/3562/photo/14969">https://app.face2gene.com/dg/lmd/3562/photo/14969</a> | 4  | 1.4 |
| 95  | Opitz GBBB Syndrome,<br>Type II; GBBB2          | <a href="https://app.face2gene.com/dg/lmd/640/photo/15940">https://app.face2gene.com/dg/lmd/640/photo/15940</a>   | 9  | 1.0 |
| 98  | Sotos Syndrome 2;<br>SOTOS2                     | <a href="https://app.face2gene.com/dg/lmd/1617/photo/17023">https://app.face2gene.com/dg/lmd/1617/photo/17023</a> | 1  | 1.0 |
| 99  | Sotos Syndrome 2;<br>SOTOS2                     | <a href="https://app.face2gene.com/dg/lmd/1617/photo/17024">https://app.face2gene.com/dg/lmd/1617/photo/17024</a> | 10 | 1.2 |
| 100 | CHARGE Syndrome                                 | <a href="https://app.face2gene.com/dg/lmd/301/photo/17094">https://app.face2gene.com/dg/lmd/301/photo/17094</a>   | 2  | 1.0 |
| 101 | Floating-Harbor<br>Syndrome; FLHS               | <a href="https://app.face2gene.com/dg/lmd/596/photo/17124">https://app.face2gene.com/dg/lmd/596/photo/17124</a>   | 1  | 1.0 |
| 103 | Cranio-metaphyseal<br>Dysplasia                 | <a href="https://app.face2gene.com/dg/lmd/371/photo/7667">https://app.face2gene.com/dg/lmd/371/photo/7667</a>     | 22 | 1.0 |
| 105 | Pitt-Hopkins<br>Syndrome; PTHS                  | <a href="https://app.face2gene.com/dg/lmd/8892/photo/18000">https://app.face2gene.com/dg/lmd/8892/photo/18000</a> | 1  | 1.0 |
| 106 | Baraitser-Winter<br>Syndrome 1; BRWS1           | <a href="https://app.face2gene.com/dg/lmd/149/photo/10154">https://app.face2gene.com/dg/lmd/149/photo/10154</a>   | 10 | 1.3 |
| 107 | Baraitser-Winter<br>Syndrome 1; BRWS1           | <a href="https://app.face2gene.com/dg/lmd/149/photo/10156">https://app.face2gene.com/dg/lmd/149/photo/10156</a>   | 41 | 2.0 |
| 108 | Baraitser-Winter<br>Syndrome 1; BRWS1           | <a href="https://app.face2gene.com/dg/lmd/149/photo/10156">https://app.face2gene.com/dg/lmd/149/photo/10156</a>   | 41 | 1.9 |
| 109 | 3MC Syndrome 3; 3MC3                            | <a href="https://app.face2gene.com/dg/lmd/1048/photo/10305">https://app.face2gene.com/dg/lmd/1048/photo/10305</a> | 2  | 1.0 |



|     |                                                      |                                                                                                                     |    |     |
|-----|------------------------------------------------------|---------------------------------------------------------------------------------------------------------------------|----|-----|
| 111 | Smith-Magenis Syndrome; SMS                          | <a href="https://app.face2gene.com/dg/lmd/3562/photo/18744">https://app.face2gene.com/dg/lmd/3562/photo/18744</a>   | 1  | 1.0 |
| 112 | Smith-Magenis Syndrome; SMS                          | <a href="https://app.face2gene.com/dg/lmd/3562/photo/18745">https://app.face2gene.com/dg/lmd/3562/photo/18745</a>   | 4  | 1.0 |
| 113 | Smith-Magenis Syndrome; SMS                          | <a href="https://app.face2gene.com/dg/lmd/3562/photo/18747">https://app.face2gene.com/dg/lmd/3562/photo/18747</a>   | 1  | 1.5 |
| 114 | Smith-Magenis Syndrome; SMS                          | <a href="https://app.face2gene.com/dg/lmd/3562/photo/18749">https://app.face2gene.com/dg/lmd/3562/photo/18749</a>   | 1  | 1.1 |
| 118 | Crouzon Syndrome                                     | <a href="https://app.face2gene.com/dg/lmd/383/photo/1133">https://app.face2gene.com/dg/lmd/383/photo/1133</a>       | 1  | 1.0 |
| 120 | Beckwith-Wiedemann Syndrome; BWS                     | <a href="https://app.face2gene.com/dg/lmd/173/photo/41779">https://app.face2gene.com/dg/lmd/173/photo/41779</a>     | 1  | 1.0 |
| 121 | Otopalatodigital Syndrome                            | <a href="https://app.face2gene.com/dg/lmd/1266/photo/41780">https://app.face2gene.com/dg/lmd/1266/photo/41780</a>   | 1  | 1.0 |
| 122 | Waardenburg Syndrome, Type 1; WS1                    | <a href="https://app.face2gene.com/dg/lmd/1781/photo/41781">https://app.face2gene.com/dg/lmd/1781/photo/41781</a>   | 1  | 1.0 |
| 123 | Rubinstein-Taybi Syndrome                            | <a href="https://app.face2gene.com/dg/lmd/1490/photo/41785">https://app.face2gene.com/dg/lmd/1490/photo/41785</a>   | 1  | 1.0 |
| 124 | Treacher Collins Syndrome                            | <a href="https://app.face2gene.com/dg/lmd/1720/photo/41799">https://app.face2gene.com/dg/lmd/1720/photo/41799</a>   | 1  | 1.0 |
| 125 | Cornelia De Lange Syndrome                           | <a href="https://app.face2gene.com/dg/lmd/423/photo/41811">https://app.face2gene.com/dg/lmd/423/photo/41811</a>     | 1  | 1.5 |
| 126 | Cornelia De Lange Syndrome                           | <a href="https://app.face2gene.com/dg/lmd/423/photo/41812">https://app.face2gene.com/dg/lmd/423/photo/41812</a>     | 1  | 1.5 |
| 127 | Cornelia De Lange Syndrome                           | <a href="https://app.face2gene.com/dg/lmd/423/photo/41813">https://app.face2gene.com/dg/lmd/423/photo/41813</a>     | 1  | 1.5 |
| 128 | Cornelia De Lange Syndrome                           | <a href="https://app.face2gene.com/dg/lmd/423/photo/41814">https://app.face2gene.com/dg/lmd/423/photo/41814</a>     | 1  | 1.5 |
| 129 | Sotos Syndrome                                       | <a href="https://app.face2gene.com/dg/lmd/1617/photo/41817">https://app.face2gene.com/dg/lmd/1617/photo/41817</a>   | 1  | 1.1 |
| 130 | Ectodermal Dysplasia 1, Hypohidrotic, X-Linked; XHED | <a href="https://app.face2gene.com/dg/lmd/508/photo/41823">https://app.face2gene.com/dg/lmd/508/photo/41823</a>     | 2  | 1.0 |
| 134 | Hutchinson-Gilford Progeria Syndrome; HGPS           | <a href="https://app.face2gene.com/dg/lmd/1396/photo/41849">https://app.face2gene.com/dg/lmd/1396/photo/41849</a>   | 1  | 1.0 |
| 136 | Hurler Syndrome                                      | <a href="https://app.face2gene.com/dg/lmd/13858/photo/41873">https://app.face2gene.com/dg/lmd/13858/photo/41873</a> | 1  | 1.1 |
| 137 | Hurler Syndrome                                      | <a href="https://app.face2gene.com/dg/lmd/13858/photo/41874">https://app.face2gene.com/dg/lmd/13858/photo/41874</a> | 1  | 1.1 |
| 138 | Mucopolysaccharidosis, Type II; MPS2                 | <a href="https://app.face2gene.com/dg/lmd/801/photo/41875">https://app.face2gene.com/dg/lmd/801/photo/41875</a>     | 1  | 1.1 |
| 139 | Mucopolysaccharidosis, Type II; MPS2                 | <a href="https://app.face2gene.com/dg/lmd/801/photo/41876">https://app.face2gene.com/dg/lmd/801/photo/41876</a>     | 1  | 1.0 |
| 140 | Mucopolysaccharidosis, Type II; MPS2                 | <a href="https://app.face2gene.com/dg/lmd/801/photo/41878">https://app.face2gene.com/dg/lmd/801/photo/41878</a>     | 1  | 1.1 |
| 141 | Mucopolysaccharidosis, Type II; MPS2                 | <a href="https://app.face2gene.com/dg/lmd/801/photo/41879">https://app.face2gene.com/dg/lmd/801/photo/41879</a>     | 1  | 1.1 |
| 142 | Mucopolysaccharidosis II Alpha/beta                  | <a href="https://app.face2gene.com/dg/lmd/838/photo/41883">https://app.face2gene.com/dg/lmd/838/photo/41883</a>     | 1  | 1.0 |
| 143 | Cleidocranial Dysplasia; CCD                         | <a href="https://app.face2gene.com/dg/lmd/13331/photo/41890">https://app.face2gene.com/dg/lmd/13331/photo/41890</a> | 5  | 1.0 |
| 144 | Cleidocranial Dysplasia; CCD                         | <a href="https://app.face2gene.com/dg/lmd/13331/photo/41891">https://app.face2gene.com/dg/lmd/13331/photo/41891</a> | 1  | 1.0 |
| 145 | Seckel Syndrome                                      | <a href="https://app.face2gene.com/dg/lmd/739/photo/41904">https://app.face2gene.com/dg/lmd/739/photo/41904</a>     | 12 | 1.2 |
| 147 | Crouzon Syndrome                                     | <a href="https://app.face2gene.com/dg/lmd/383/photo/41914">https://app.face2gene.com/dg/lmd/383/photo/41914</a>     | 2  | 1.0 |
| 153 | Sotos Syndrome                                       | <a href="https://app.face2gene.com/dg/lmd/1617/photo/41940">https://app.face2gene.com/dg/lmd/1617/photo/41940</a>   | 1  | 1.0 |
| 154 | Sotos Syndrome                                       | <a href="https://app.face2gene.com/dg/lmd/1617/photo/41941">https://app.face2gene.com/dg/lmd/1617/photo/41941</a>   | 1  | 1.2 |
| 157 | Cleidocranial Dysplasia; CCD                         | <a href="https://app.face2gene.com/dg/lmd/13331/photo/41947">https://app.face2gene.com/dg/lmd/13331/photo/41947</a> | 1  | 1.0 |
| 158 | Treacher Collins Syndrome                            | <a href="https://app.face2gene.com/dg/lmd/1720/photo/41956">https://app.face2gene.com/dg/lmd/1720/photo/41956</a>   | 4  | 1.0 |

|     |                                       |                                                                                                                     |    |     |
|-----|---------------------------------------|---------------------------------------------------------------------------------------------------------------------|----|-----|
| 159 | Treacher Collins Syndrome             | <a href="https://app.face2gene.com/dg/lmd/1720/photo/41958">https://app.face2gene.com/dg/lmd/1720/photo/41958</a>   | 1  | 1.0 |
| 163 | Fragile X Mental Retardation Syndrome | <a href="https://app.face2gene.com/dg/lmd/13243/photo/41973">https://app.face2gene.com/dg/lmd/13243/photo/41973</a> | 1  | 3.3 |
| 165 | Smith-Magenis Syndrome; SMS           | <a href="https://app.face2gene.com/dg/lmd/3562/photo/15947">https://app.face2gene.com/dg/lmd/3562/photo/15947</a>   | 1  | 1.4 |
| 166 | Pierpont Syndrome; PRPTS              | <a href="https://app.face2gene.com/dg/lmd/4198/photo/41638">https://app.face2gene.com/dg/lmd/4198/photo/41638</a>   | 3  | 1.0 |
| 167 | Pierpont Syndrome; PRPTS              | <a href="https://app.face2gene.com/dg/lmd/4198/photo/41640">https://app.face2gene.com/dg/lmd/4198/photo/41640</a>   | 1  | 1.0 |
| 168 | SHORT syndrome                        | <a href="https://app.face2gene.com/dg/lmd/1574/photo/4780">https://app.face2gene.com/dg/lmd/1574/photo/4780</a>     | 1  | 1.0 |
| 169 | Kabuki Syndrome                       | <a href="https://app.face2gene.com/dg/lmd/893/photo/2566">https://app.face2gene.com/dg/lmd/893/photo/2566</a>       | 1  | 1.0 |
| 170 | Kabuki Syndrome                       | <a href="https://app.face2gene.com/dg/lmd/893/photo/2560">https://app.face2gene.com/dg/lmd/893/photo/2560</a>       | 1  | 1.0 |
| 171 | Kabuki Syndrome                       | <a href="https://app.face2gene.com/dg/lmd/893/photo/2562">https://app.face2gene.com/dg/lmd/893/photo/2562</a>       | 8  | 1.8 |
| 172 | Otopalatodigital Syndrome             | <a href="https://app.face2gene.com/dg/lmd/1266/photo/3719">https://app.face2gene.com/dg/lmd/1266/photo/3719</a>     | 1  | 1.0 |
| 173 | Coffin-Lowry Syndrome; CLS            | <a href="https://app.face2gene.com/dg/lmd/328/photo/977">https://app.face2gene.com/dg/lmd/328/photo/977</a>         | 1  | 1.0 |
| 174 | Ohdo Syndrome, SBBYS Variant; SBBYSS  | <a href="https://app.face2gene.com/dg/lmd/1255/photo/8343">https://app.face2gene.com/dg/lmd/1255/photo/8343</a>     | 1  | 1.0 |
| 175 | Rubinstein-Taybi Syndrome 1; RSTS1    | <a href="https://app.face2gene.com/dg/lmd/358/photo/11625">https://app.face2gene.com/dg/lmd/358/photo/11625</a>     | 2  | 1.1 |
| 176 | Auriculocondylar Syndrome 1; ARCND1   | <a href="https://app.face2gene.com/dg/lmd/4192/photo/12354">https://app.face2gene.com/dg/lmd/4192/photo/12354</a>   | 1  | 1.0 |
| 177 | Coffin-Siris Syndrome1; CSS1          | <a href="https://app.face2gene.com/dg/lmd/329/photo/12530">https://app.face2gene.com/dg/lmd/329/photo/12530</a>     | 1  | 1.0 |
| 178 | Urofacial Syndrome 1; UFS1            | <a href="https://app.face2gene.com/dg/lmd/1236/photo/13084">https://app.face2gene.com/dg/lmd/1236/photo/13084</a>   | 3  | 1.0 |
| 179 | 3MC Syndrome 3; 3MC3                  | <a href="https://app.face2gene.com/dg/lmd/1048/photo/13477">https://app.face2gene.com/dg/lmd/1048/photo/13477</a>   | 1  | 1.0 |
| 180 | Smith-Lemli-Opitz Syndrome; SLOS      | <a href="https://app.face2gene.com/dg/lmd/1608/photo/14313">https://app.face2gene.com/dg/lmd/1608/photo/14313</a>   | 1  | 1.0 |
| 181 | 3MC Syndrome 3; 3MC3                  | <a href="https://app.face2gene.com/dg/lmd/1048/photo/14727">https://app.face2gene.com/dg/lmd/1048/photo/14727</a>   | 1  | 1.0 |
| 183 | Lig4 Syndrome                         | <a href="https://app.face2gene.com/dg/lmd/4654/photo/17338">https://app.face2gene.com/dg/lmd/4654/photo/17338</a>   | 16 | 1.0 |
| 184 | Craniometaphyseal Dysplasia           | <a href="https://app.face2gene.com/dg/lmd/371/photo/1078">https://app.face2gene.com/dg/lmd/371/photo/1078</a>       | 1  | 1.0 |
| 188 | Craniofrontonasal Syndrome; CFNS      | <a href="https://app.face2gene.com/dg/lmd/376/photo/1113">https://app.face2gene.com/dg/lmd/376/photo/1113</a>       | 1  | 1.0 |
| 190 | Floating-Harbor Syndrome; FLHS        | <a href="https://app.face2gene.com/dg/lmd/596/photo/1756">https://app.face2gene.com/dg/lmd/596/photo/1756</a>       | 1  | 1.0 |
| 191 | Rubinstein-Taybi Syndrome 1; RSTS1    | <a href="https://app.face2gene.com/dg/lmd/1490/photo/4488">https://app.face2gene.com/dg/lmd/1490/photo/4488</a>     | 1  | 1.0 |
| 192 | Coffin-Siris Syndrome1; CSS1          | <a href="https://app.face2gene.com/dg/lmd/329/photo/981">https://app.face2gene.com/dg/lmd/329/photo/981</a>         | 1  | 1.0 |
| 193 | Rubinstein-Taybi Syndrome 1; RSTS1    | <a href="https://app.face2gene.com/dg/lmd/1490/photo/4489">https://app.face2gene.com/dg/lmd/1490/photo/4489</a>     | 1  | 1.0 |
| 194 | Noonan Syndrome                       | <a href="https://app.face2gene.com/dg/lmd/1229/photo/3585">https://app.face2gene.com/dg/lmd/1229/photo/3585</a>     | 1  | 1.1 |
| 195 | Floating-Harbor Syndrome; FLHS        | <a href="https://app.face2gene.com/dg/lmd/596/photo/8231">https://app.face2gene.com/dg/lmd/596/photo/8231</a>       | 1  | 1.0 |
| 196 | Smith-Lemli-Opitz Syndrome; SLOS      | <a href="https://app.face2gene.com/dg/lmd/1608/photo/12105">https://app.face2gene.com/dg/lmd/1608/photo/12105</a>   | 1  | 1.0 |
| 197 | Smith-Lemli-Opitz Syndrome; SLOS      | <a href="https://app.face2gene.com/dg/lmd/1608/photo/12105">https://app.face2gene.com/dg/lmd/1608/photo/12105</a>   | 2  | 1.0 |
| 198 | Kabuki Syndrome                       | <a href="https://app.face2gene.com/dg/lmd/893/photo/13113">https://app.face2gene.com/dg/lmd/893/photo/13113</a>     | 1  | 1.0 |
| 199 | Kabuki Syndrome                       | <a href="https://app.face2gene.com/dg/lmd/893/photo/13113">https://app.face2gene.com/dg/lmd/893/photo/13113</a>     | 1  | 1.1 |
| 200 | Sotos Syndrome 2; SOTOS2              | <a href="https://app.face2gene.com/dg/lmd/1617/photo/15150">https://app.face2gene.com/dg/lmd/1617/photo/15150</a>   | 1  | 1.1 |
| 203 | Sotos Syndrome 2; SOTOS2              | <a href="https://app.face2gene.com/dg/lmd/1617/photo/17025">https://app.face2gene.com/dg/lmd/1617/photo/17025</a>   | 1  | 1.1 |

|     |                                                          |                                                                                                                     |    |      |
|-----|----------------------------------------------------------|---------------------------------------------------------------------------------------------------------------------|----|------|
| 205 | Smith-Magenis Syndrome;<br>SMS                           | <a href="https://app.face2gene.com/dg/lmd/3562/photo/18745">https://app.face2gene.com/dg/lmd/3562/photo/18745</a>   | 1  | 1.3  |
| 206 | Smith-Magenis Syndrome;<br>SMS                           | <a href="https://app.face2gene.com/dg/lmd/3562/photo/18745">https://app.face2gene.com/dg/lmd/3562/photo/18745</a>   | 1  | 1.1  |
| 207 | Birk-Barel Mental<br>Retardation Dysmorphism<br>Syndrome | <a href="https://app.face2gene.com/dg/lmd/5569/photo/19317">https://app.face2gene.com/dg/lmd/5569/photo/19317</a>   | 12 | 1.4  |
| 209 | Focal Dermal Hypoplasia;<br>FDH                          | <a href="https://app.face2gene.com/dg/lmd/13389/photo/41764">https://app.face2gene.com/dg/lmd/13389/photo/41764</a> | 1  | 1.0  |
| 214 | Cornelia De Lange<br>Syndrome                            | <a href="https://app.face2gene.com/dg/lmd/423/photo/41808">https://app.face2gene.com/dg/lmd/423/photo/41808</a>     | 1  | 1.0  |
| 215 | Cornelia De Lange<br>Syndrome                            | <a href="https://app.face2gene.com/dg/lmd/423/photo/41810">https://app.face2gene.com/dg/lmd/423/photo/41810</a>     | 1  | 1.0  |
| 216 | Sotos Syndrome                                           | <a href="https://app.face2gene.com/dg/lmd/1617/photo/41818">https://app.face2gene.com/dg/lmd/1617/photo/41818</a>   | 1  | 1.2  |
| 218 | Focal Dermal<br>Hypoplasia; FDH                          | <a href="https://app.face2gene.com/dg/lmd/13389/photo/41822">https://app.face2gene.com/dg/lmd/13389/photo/41822</a> | 6  | 1.0  |
| 219 | Mucopolysaccharidosis,<br>Type II; MPS2                  | <a href="https://app.face2gene.com/dg/lmd/801/photo/41824">https://app.face2gene.com/dg/lmd/801/photo/41824</a>     | 3  | 1.2  |
| 221 | Crouzon Syndrome                                         | <a href="https://app.face2gene.com/dg/lmd/383/photo/41842">https://app.face2gene.com/dg/lmd/383/photo/41842</a>     | 1  | 1.0  |
| 222 | Rubinstein-Taybi<br>Syndrome                             | <a href="https://app.face2gene.com/dg/lmd/1490/photo/41844">https://app.face2gene.com/dg/lmd/1490/photo/41844</a>   | 1  | 1.0  |
| 223 | Hutchinson-Gilford<br>Progeria Syndrome;<br>HGPS         | <a href="https://app.face2gene.com/dg/lmd/1396/photo/41845">https://app.face2gene.com/dg/lmd/1396/photo/41845</a>   | 1  | 1.0  |
| 224 | Hutchinson-Gilford<br>Progeria Syndrome;<br>HGPS         | <a href="https://app.face2gene.com/dg/lmd/1396/photo/41846">https://app.face2gene.com/dg/lmd/1396/photo/41846</a>   | 1  | 1.0  |
| 225 | Hutchinson-Gilford<br>Progeria Syndrome;<br>HGPS         | <a href="https://app.face2gene.com/dg/lmd/1396/photo/41847">https://app.face2gene.com/dg/lmd/1396/photo/41847</a>   | 1  | 1.0  |
| 226 | Hutchinson-Gilford<br>Progeria Syndrome;<br>HGPS         | <a href="https://app.face2gene.com/dg/lmd/1396/photo/41848">https://app.face2gene.com/dg/lmd/1396/photo/41848</a>   | 1  | 1.0  |
| 227 | Hutchinson-Gilford<br>Progeria Syndrome;<br>HGPS         | <a href="https://app.face2gene.com/dg/lmd/1396/photo/41850">https://app.face2gene.com/dg/lmd/1396/photo/41850</a>   | 1  | 1.0  |
| 228 | Noonan Syndrome                                          | <a href="https://app.face2gene.com/dg/lmd/1229/photo/41851">https://app.face2gene.com/dg/lmd/1229/photo/41851</a>   | 1  | 1.0  |
| 231 | Rubinstein-Taybi<br>Syndrome                             | <a href="https://app.face2gene.com/dg/lmd/1490/photo/41859">https://app.face2gene.com/dg/lmd/1490/photo/41859</a>   | 1  | 1.0  |
| 232 | Achondroplasia; ACH                                      | <a href="https://app.face2gene.com/dg/lmd/17/photo/41871">https://app.face2gene.com/dg/lmd/17/photo/41871</a>       | 9  | 1.0  |
| 233 | Hurler Syndrome                                          | <a href="https://app.face2gene.com/dg/lmd/13858/photo/41872">https://app.face2gene.com/dg/lmd/13858/photo/41872</a> | 1  | 1.4  |
| 234 | Cleidocranial<br>Dysplasia; CCD                          | <a href="https://app.face2gene.com/dg/lmd/13331/photo/41899">https://app.face2gene.com/dg/lmd/13331/photo/41899</a> | 1  | 1.0  |
| 236 | Saethre-Chotzen<br>Syndrome; SCS                         | <a href="https://app.face2gene.com/dg/lmd/1504/photo/41909">https://app.face2gene.com/dg/lmd/1504/photo/41909</a>   | 1  | 1.0  |
| 237 | Cleidocranial<br>Dysplasia; CCD                          | <a href="https://app.face2gene.com/dg/lmd/13331/photo/41948">https://app.face2gene.com/dg/lmd/13331/photo/41948</a> | 7  | 1.6  |
| 238 | Treacher Collins<br>Syndrome                             | <a href="https://app.face2gene.com/dg/lmd/1720/photo/41951">https://app.face2gene.com/dg/lmd/1720/photo/41951</a>   | 1  | 1.0  |
| 239 | Treacher Collins<br>Syndrome                             | <a href="https://app.face2gene.com/dg/lmd/1720/photo/41952">https://app.face2gene.com/dg/lmd/1720/photo/41952</a>   | 1  | 1.0  |
| 240 | Treacher Collins<br>Syndrome                             | <a href="https://app.face2gene.com/dg/lmd/1720/photo/41954">https://app.face2gene.com/dg/lmd/1720/photo/41954</a>   | 1  | 1.0  |
| 241 | Treacher Collins<br>Syndrome                             | <a href="https://app.face2gene.com/dg/lmd/1720/photo/41959">https://app.face2gene.com/dg/lmd/1720/photo/41959</a>   | 1  | 1.0  |
| 242 | Treacher Collins<br>Syndrome                             | <a href="https://app.face2gene.com/dg/lmd/1720/photo/41960">https://app.face2gene.com/dg/lmd/1720/photo/41960</a>   | 1  | 1.0  |
| 243 | Fragile X Mental<br>Retardation Syndrome                 | <a href="https://app.face2gene.com/dg/lmd/13243/photo/41982">https://app.face2gene.com/dg/lmd/13243/photo/41982</a> | 1  | 12.6 |

|     |                                                            |                                                                                                                     |    |      |
|-----|------------------------------------------------------------|---------------------------------------------------------------------------------------------------------------------|----|------|
| 244 | Pitt-Hopkins Syndrome;<br>PTHS                             | <a href="https://app.face2gene.com/dg/lmd/8892/photo/18003">https://app.face2gene.com/dg/lmd/8892/photo/18003</a>   | 1  | 1.0  |
| 245 | Nijmegen Breakage<br>Syndrome; NBS                         | <a href="https://app.face2gene.com/dg/lmd/347/photo/4723">https://app.face2gene.com/dg/lmd/347/photo/4723</a>       | 1  | 1.0  |
| 246 | Nijmegen Breakage<br>Syndrome; NBS                         | <a href="https://app.face2gene.com/dg/lmd/347/photo/4736">https://app.face2gene.com/dg/lmd/347/photo/4736</a>       | 13 | 1.0  |
| 247 | Noonan Syndrome                                            | <a href="https://app.face2gene.com/dg/lmd/1946/photo/5983">https://app.face2gene.com/dg/lmd/1946/photo/5983</a>     | 2  | 1.0  |
| 248 | Kabuki Syndrome                                            | <a href="https://app.face2gene.com/dg/lmd/893/photo/2565">https://app.face2gene.com/dg/lmd/893/photo/2565</a>       | 1  | 1.1  |
| 249 | Craniodiaphyseal<br>Dysplasia; CDD                         | <a href="https://app.face2gene.com/dg/lmd/373/photo/1091">https://app.face2gene.com/dg/lmd/373/photo/1091</a>       | 1  | 1.0  |
| 250 | Ectodermal Dysplasia 1,<br>Hypohidrotic, X-Linked;<br>XHED | <a href="https://app.face2gene.com/dg/lmd/508/photo/1400">https://app.face2gene.com/dg/lmd/508/photo/1400</a>       | 1  | 1.0  |
| 251 | Mowat-Wilson<br>Syndrome; MOWS                             | <a href="https://app.face2gene.com/dg/lmd/4211/photo/13735">https://app.face2gene.com/dg/lmd/4211/photo/13735</a>   | 1  | 1.0  |
| 252 | 3MC Syndrome 3; 3MC3                                       | <a href="https://app.face2gene.com/dg/lmd/1048/photo/13467">https://app.face2gene.com/dg/lmd/1048/photo/13467</a>   | 1  | 1.0  |
| 253 | Auriculocondylar<br>Syndrome 1; ARCND1                     | <a href="https://app.face2gene.com/dg/lmd/4192/photo/14125">https://app.face2gene.com/dg/lmd/4192/photo/14125</a>   | 2  | 1.0  |
| 254 | Nicolaides-Baraitser<br>Syndrome; NCBRS                    | <a href="https://app.face2gene.com/dg/lmd/3394/photo/14255">https://app.face2gene.com/dg/lmd/3394/photo/14255</a>   | 1  | 1.0  |
| 255 | Smith-Magenis<br>Syndrome; SMS                             | <a href="https://app.face2gene.com/dg/lmd/3562/photo/14454">https://app.face2gene.com/dg/lmd/3562/photo/14454</a>   | 1  | 1.1  |
| 256 | Nicolaides-Baraitser<br>Syndrome; NCBRS                    | <a href="https://app.face2gene.com/dg/lmd/3394/photo/14700">https://app.face2gene.com/dg/lmd/3394/photo/14700</a>   | 1  | 1.0  |
| 257 | Noonan Syndrome                                            | <a href="https://app.face2gene.com/dg/lmd/1229/photo/3581">https://app.face2gene.com/dg/lmd/1229/photo/3581</a>     | 1  | 1.0  |
| 258 | KBG Syndrome; KBGS                                         | <a href="https://app.face2gene.com/dg/lmd/912/photo/15604">https://app.face2gene.com/dg/lmd/912/photo/15604</a>     | 1  | 1.0  |
| 261 | Beckwith-Wiedemann<br>Syndrome; BWS                        | <a href="https://app.face2gene.com/dg/lmd/173/photo/481">https://app.face2gene.com/dg/lmd/173/photo/481</a>         | 6  | 1.0  |
| 262 | Craniofrontonasal<br>Syndrome; CFNS                        | <a href="https://app.face2gene.com/dg/lmd/376/photo/1115">https://app.face2gene.com/dg/lmd/376/photo/1115</a>       | 1  | 1.0  |
| 263 | Floating-Harbor<br>Syndrome; FLHS                          | <a href="https://app.face2gene.com/dg/lmd/596/photo/1760">https://app.face2gene.com/dg/lmd/596/photo/1760</a>       | 1  | 1.0  |
| 264 | Coffin-Lowry Syndrome;<br>CLS                              | <a href="https://app.face2gene.com/dg/lmd/328/photo/974">https://app.face2gene.com/dg/lmd/328/photo/974</a>         | 1  | 1.0  |
| 265 | Sotos Syndrome 2;<br>SOTOS2                                | <a href="https://app.face2gene.com/dg/lmd/1617/photo/15146">https://app.face2gene.com/dg/lmd/1617/photo/15146</a>   | 1  | 1.0  |
| 266 | Smith-Magenis<br>Syndrome; SMS                             | <a href="https://app.face2gene.com/dg/lmd/3562/photo/15950">https://app.face2gene.com/dg/lmd/3562/photo/15950</a>   | 1  | 1.2  |
| 268 | Lateral Meningocele<br>Syndrome; LMNS                      | <a href="https://app.face2gene.com/dg/lmd/983/photo/10028">https://app.face2gene.com/dg/lmd/983/photo/10028</a>     | 3  | 1.0  |
| 269 | KBG Syndrome; KBGS                                         | <a href="https://app.face2gene.com/dg/lmd/912/photo/10163">https://app.face2gene.com/dg/lmd/912/photo/10163</a>     | 1  | 1.0  |
| 270 | Smith-Magenis Syndrome;<br>SMS                             | <a href="https://app.face2gene.com/dg/lmd/3562/photo/18749">https://app.face2gene.com/dg/lmd/3562/photo/18749</a>   | 4  | 18.7 |
| 272 | Bardet-Biedl Syndrome                                      | <a href="https://app.face2gene.com/dg/lmd/13278/photo/41796">https://app.face2gene.com/dg/lmd/13278/photo/41796</a> | 1  | 1.0  |
| 273 | Cornelia De Lange<br>Syndrome                              | <a href="https://app.face2gene.com/dg/lmd/423/photo/41807">https://app.face2gene.com/dg/lmd/423/photo/41807</a>     | 1  | 1.5  |
| 275 | Crouzon Syndrome                                           | <a href="https://app.face2gene.com/dg/lmd/383/photo/41828">https://app.face2gene.com/dg/lmd/383/photo/41828</a>     | 1  | 1.0  |
| 277 | Rubinstein-Taybi<br>Syndrome                               | <a href="https://app.face2gene.com/dg/lmd/1490/photo/41858">https://app.face2gene.com/dg/lmd/1490/photo/41858</a>   | 1  | 1.0  |
| 278 | Rubinstein-Taybi<br>Syndrome                               | <a href="https://app.face2gene.com/dg/lmd/1490/photo/41860">https://app.face2gene.com/dg/lmd/1490/photo/41860</a>   | 1  | 1.0  |
| 279 | Mucopolysaccharidosis,<br>Type II; MPS2                    | <a href="https://app.face2gene.com/dg/lmd/801/photo/41877">https://app.face2gene.com/dg/lmd/801/photo/41877</a>     | 1  | 1.0  |
| 280 | Trichorhinophalangeal<br>Syndrome                          | <a href="https://app.face2gene.com/dg/lmd/1730/photo/41886">https://app.face2gene.com/dg/lmd/1730/photo/41886</a>   | 1  | 1.0  |
| 281 | Trichorhinophalangeal<br>Syndrome                          | <a href="https://app.face2gene.com/dg/lmd/1730/photo/41887">https://app.face2gene.com/dg/lmd/1730/photo/41887</a>   | 1  | 1.0  |
| 282 | Cleidocranial<br>Dysplasia; CCD                            | <a href="https://app.face2gene.com/dg/lmd/13331/photo/41900">https://app.face2gene.com/dg/lmd/13331/photo/41900</a> | 32 | 3.1  |

|     |                                                    |                                                                                                                   |    |     |
|-----|----------------------------------------------------|-------------------------------------------------------------------------------------------------------------------|----|-----|
| 283 | Saethre-Chotzen Syndrome; SCS                      | <a href="https://app.face2gene.com/dg/lmd/1504/photo/41910">https://app.face2gene.com/dg/lmd/1504/photo/41910</a> | 42 | 1.0 |
| 284 | Treacher Collins Syndrome                          | <a href="https://app.face2gene.com/dg/lmd/1720/photo/41961">https://app.face2gene.com/dg/lmd/1720/photo/41961</a> | 1  | 1.0 |
| 286 | Frontometaphyseal Dysplasia; FMD                   | <a href="https://app.face2gene.com/dg/lmd/622/photo/41685">https://app.face2gene.com/dg/lmd/622/photo/41685</a>   | 1  | 1.0 |
| 287 | Kabuki Syndrome                                    | <a href="https://app.face2gene.com/dg/lmd/893/photo/2569">https://app.face2gene.com/dg/lmd/893/photo/2569</a>     | 1  | 1.0 |
| 288 | Nijmegen Breakage Syndrome; NBS                    | <a href="https://app.face2gene.com/dg/lmd/347/photo/4728">https://app.face2gene.com/dg/lmd/347/photo/4728</a>     | 7  | 1.0 |
| 289 | Coffin-Lowry Syndrome; CLS                         | <a href="https://app.face2gene.com/dg/lmd/328/photo/978">https://app.face2gene.com/dg/lmd/328/photo/978</a>       | 1  | 1.0 |
| 290 | Hutchinson-Gilford Progeria Syndrome; HGPS         | <a href="https://app.face2gene.com/dg/lmd/1396/photo/4126">https://app.face2gene.com/dg/lmd/1396/photo/4126</a>   | 1  | 1.0 |
| 291 | Costello Syndrome; CSTLO                           | <a href="https://app.face2gene.com/dg/lmd/2014/photo/6166">https://app.face2gene.com/dg/lmd/2014/photo/6166</a>   | 2  | 1.0 |
| 292 | Kabuki Syndrome                                    | <a href="https://app.face2gene.com/dg/lmd/893/photo/13115">https://app.face2gene.com/dg/lmd/893/photo/13115</a>   | 1  | 1.0 |
| 293 | Noonan Syndrome                                    | <a href="https://app.face2gene.com/dg/lmd/4716/photo/14088">https://app.face2gene.com/dg/lmd/4716/photo/14088</a> | 7  | 2.4 |
| 294 | Noonan Syndrome                                    | <a href="https://app.face2gene.com/dg/lmd/4716/photo/14090">https://app.face2gene.com/dg/lmd/4716/photo/14090</a> | 3  | 1.2 |
| 295 | Noonan Syndrome                                    | <a href="https://app.face2gene.com/dg/lmd/4716/photo/14091">https://app.face2gene.com/dg/lmd/4716/photo/14091</a> | 2  | 1.0 |
| 296 | Noonan Syndrome                                    | <a href="https://app.face2gene.com/dg/lmd/4716/photo/14092">https://app.face2gene.com/dg/lmd/4716/photo/14092</a> | 1  | 1.0 |
| 297 | KBG Syndrome; KBGS                                 | <a href="https://app.face2gene.com/dg/lmd/912/photo/15603">https://app.face2gene.com/dg/lmd/912/photo/15603</a>   | 1  | 1.0 |
| 298 | Opitz GBBB Syndrome, Type II; GBBB2                | <a href="https://app.face2gene.com/dg/lmd/640/photo/15945">https://app.face2gene.com/dg/lmd/640/photo/15945</a>   | 3  | 1.0 |
| 299 | Gapo Syndrome                                      | <a href="https://app.face2gene.com/dg/lmd/642/photo/16435">https://app.face2gene.com/dg/lmd/642/photo/16435</a>   | 3  | 1.0 |
| 300 | Velocardiofacial Syndrome                          | <a href="https://app.face2gene.com/dg/lmd/1762/photo/19049">https://app.face2gene.com/dg/lmd/1762/photo/19049</a> | 13 | 1.0 |
| 301 | Velocardiofacial Syndrome                          | <a href="https://app.face2gene.com/dg/lmd/1762/photo/5395">https://app.face2gene.com/dg/lmd/1762/photo/5395</a>   | 21 | 1.0 |
| 302 | Trichorhinophalangeal Syndrome                     | <a href="https://app.face2gene.com/dg/lmd/1730/photo/5284">https://app.face2gene.com/dg/lmd/1730/photo/5284</a>   | 1  | 1.0 |
| 304 | Noonan Syndrome                                    | <a href="https://app.face2gene.com/dg/lmd/1229/photo/3582">https://app.face2gene.com/dg/lmd/1229/photo/3582</a>   | 26 | 2.6 |
| 305 | Craniofrontonasal Syndrome; CFNS                   | <a href="https://app.face2gene.com/dg/lmd/376/photo/1114">https://app.face2gene.com/dg/lmd/376/photo/1114</a>     | 1  | 1.1 |
| 306 | Trichorhinophalangeal Syndrome                     | <a href="https://app.face2gene.com/dg/lmd/1730/photo/5282">https://app.face2gene.com/dg/lmd/1730/photo/5282</a>   | 1  | 1.0 |
| 307 | Alagille Syndrome                                  | <a href="https://app.face2gene.com/dg/lmd/110/photo/349">https://app.face2gene.com/dg/lmd/110/photo/349</a>       | 1  | 1.0 |
| 308 | Smith-Lemli-Opitz Syndrome; SLOS                   | <a href="https://app.face2gene.com/dg/lmd/1608/photo/12105">https://app.face2gene.com/dg/lmd/1608/photo/12105</a> | 2  | 1.0 |
| 309 | Opitz GBBB Syndrome, Type II; GBBB2                | <a href="https://app.face2gene.com/dg/lmd/640/photo/15943">https://app.face2gene.com/dg/lmd/640/photo/15943</a>   | 1  | 1.0 |
| 312 | Cornelia de Lange Syndrome 1; CDLS1                | <a href="https://app.face2gene.com/dg/lmd/423/photo/17342">https://app.face2gene.com/dg/lmd/423/photo/17342</a>   | 1  | 1.5 |
| 313 | Craniometaphyseal Dysplasia                        | <a href="https://app.face2gene.com/dg/lmd/371/photo/7667">https://app.face2gene.com/dg/lmd/371/photo/7667</a>     | 5  | 1.0 |
| 314 | Coffin-Lowry Syndrome; CLS                         | <a href="https://app.face2gene.com/dg/lmd/328/photo/17870">https://app.face2gene.com/dg/lmd/328/photo/17870</a>   | 1  | 1.0 |
| 315 | Coffin-Lowry Syndrome; CLS                         | <a href="https://app.face2gene.com/dg/lmd/328/photo/17868">https://app.face2gene.com/dg/lmd/328/photo/17868</a>   | 6  | 1.0 |
| 316 | Coffin-Lowry Syndrome; CLS                         | <a href="https://app.face2gene.com/dg/lmd/328/photo/17868">https://app.face2gene.com/dg/lmd/328/photo/17868</a>   | 60 | 4.6 |
| 317 | Branchiooculofacial Syndrome; BOFS                 | <a href="https://app.face2gene.com/dg/lmd/633/photo/9227">https://app.face2gene.com/dg/lmd/633/photo/9227</a>     | 17 | 1.1 |
| 318 | Smith-Magenis Syndrome; SMS                        | <a href="https://app.face2gene.com/dg/lmd/3562/photo/18747">https://app.face2gene.com/dg/lmd/3562/photo/18747</a> | 2  | 4.7 |
| 319 | Oculodentodigital Dysplasia                        | <a href="https://app.face2gene.com/dg/lmd/1246/photo/19085">https://app.face2gene.com/dg/lmd/1246/photo/19085</a> | 8  | 1.0 |
| 320 | Birk-Barel Mental Retardation Dysmorphism Syndrome | <a href="https://app.face2gene.com/dg/lmd/5569/photo/19317">https://app.face2gene.com/dg/lmd/5569/photo/19317</a> | 15 | 1.0 |

|     |                                     |                                                                                                                   |   |     |
|-----|-------------------------------------|-------------------------------------------------------------------------------------------------------------------|---|-----|
| 322 | Craniometaphyseal<br>Dysplasia      | <a href="https://app.face2gene.com/dg/lmd/371/photo/41763">https://app.face2gene.com/dg/lmd/371/photo/41763</a>   | 1 | 1.0 |
| 323 | Rubinstein-Taybi<br>Syndrome        | <a href="https://app.face2gene.com/dg/lmd/1490/photo/41843">https://app.face2gene.com/dg/lmd/1490/photo/41843</a> | 1 | 1.0 |
| 324 | Seckel Syndrome                     | <a href="https://app.face2gene.com/dg/lmd/739/photo/41855">https://app.face2gene.com/dg/lmd/739/photo/41855</a>   | 1 | 1.0 |
| 326 | Crouzon Syndrome                    | <a href="https://app.face2gene.com/dg/lmd/383/photo/41942">https://app.face2gene.com/dg/lmd/383/photo/41942</a>   | 1 | 1.0 |
| 327 | Treacher Collins<br>Syndrome        | <a href="https://app.face2gene.com/dg/lmd/1720/photo/41957">https://app.face2gene.com/dg/lmd/1720/photo/41957</a> | 1 | 1.0 |
| 329 | Frontometaphyseal<br>Dysplasia; FMD | <a href="https://app.face2gene.com/dg/lmd/622/photo/41569">https://app.face2gene.com/dg/lmd/622/photo/41569</a>   | 1 | 1.0 |

**Supplementary Table 3:** Comparison results of using different scores for gene prioritization. First column indicates the scores used in each row. The second and third columns are the Top-1 and Top-10 accuracy and confidence interval. For genes with the same PEDIA score, the highest (worst) rank was used for all of them, as this represents best the associated time for the workup. (F, Feature match score. C, CADD score. G, Gestalt score. P, Phenomizer score. B, Boqa score).

|                                | Top-1 (%)          | Top-10 (%)         |
|--------------------------------|--------------------|--------------------|
| <b>Photo + Exome + Feature</b> |                    |                    |
| F,C,G,B,P                      | 89.4 [81.4 - 97.4] | 98.7 [95.7 - 100]  |
| C,G,B,P                        | 89.0 [80.0 - 98.0] | 98.7 [95.1 - 100]  |
| F,C,G,P                        | 89.1 [79.9 - 98.3] | 98.5 [95.1 - 100]  |
| F,C,G,B                        | 87.9 [78.7 - 97.1] | 98.1 [94.7 - 100]  |
| C,G,P                          | 88.5 [79.3 - 97.7] | 98.2 [93.8 - 100]  |
| C,G,B                          | 86.0 [75.4 - 96.6] | 97.8 [95.8 - 99.8] |
| F,C,G                          | 87.8 [76.4 - 99.2] | 97.9 [94.1 - 100]  |
| <b>Photo + Exome</b>           |                    |                    |
| C,G                            | 82.6 [67.6 - 97.6] | 97.5 [95.1 - 99.9] |
| <b>Photo + Feature</b>         |                    |                    |
| F,G,B,P                        | 25.1 [1.7 - 48.5]  | 69.2 [35.8 - 100]  |
| G,B,P                          | 24.0 [3.0 - 45.0]  | 65.0 [32.4 - 97.6] |
| F,G,P                          | 20.5 [1.7 - 39.3]  | 67.2 [33.0 - 100]  |
| F,G,B                          | 23.1 [1.5 - 44.7]  | 65.9 [36.1 - 95.7] |
| G,P                            | 18.6 [2.6 - 34.6]  | 61.3 [24.9 - 97.7] |
| G,B                            | 22.0 [4.6 - 39.4]  | 58.6 [31.4 - 85.8] |
| F,G                            | 16.8 [0 - 34.4]    | 59.2 [29.8 - 88.6] |
| <b>Exome + Feature</b>         |                    |                    |
| F,C,B,P                        | 74.4 [60.0 - 88.8] | 93.7 [88.5 - 98.9] |
| C,B,P                          | 61.4 [43.2 - 79.6] | 89.0 [84.2 - 93.8] |
| F,C,P                          | 74.1 [64.1 - 84.1] | 93.8 [87.2 - 100]  |
| F,C,B                          | 65.8 [47.8 - 83.8] | 91.3 [82.1 - 100]  |
| C,P                            | 57.9 [39.1 - 76.7] | 88.7 [81.3 - 96.1] |
| C,B                            | 35.5 [12.1 - 58.9] | 62.8 [40.4 - 85.2] |
| F,C                            | 65.1 [49.1 - 81.1] | 90.9 [80.5 - 100]  |
| <b>Photo</b>                   |                    |                    |
| G                              | 14.3 [0.3 - 28.3]  | 48.6 [23.4 - 73.8] |
| <b>Exome</b>                   |                    |                    |
| C                              | 14.1 [0 - 31.1]    | 44.6 [13.6 - 75.6] |
| <b>Feature</b>                 |                    |                    |
| F,B,P                          | 16.4 [0 - 34.2]    | 54.4 [25.4 - 83.4] |
| B,P                            | 16.2 [0.8 - 31.6]  | 48.9 [21.9 - 75.9] |
| F,P                            | 16.7 [0 - 36.9]    | 53.8 [27.0 - 80.6] |
| F,B                            | 16.4 [0 - 34.4]    | 53.8 [24.6 - 83.0] |
| P                              | 1.8 [0 - 4.6]      | 16.4 [0 - 33.2]    |
| B                              | 11.2 [0 - 28.8]    | 46.4 [22.0 - 70.8] |
| F                              | 13.4 [0 - 29.4]    | 50.7 [25.5 - 75.9] |
